# Supplementary material for: Hydrogen and oxygen evolution reactions on single atom catalysts stabilized by a covalent organic framework
Source: Royal Society of Chemistry journal article supplement (doi:10.1039/d3ya00162h), 2023-01-01
Supplement: d3ya00162h1.pdf [file d3ya00162h1.pdf]

## SUPPORTING INFORMATION

# Hydrogen and Oxygen Evolution Reactions on Single Atom Catalysts Stabilized by a Covalent Organic Framework

Ilaria Barlocco, Giovanni Di Liberto,\* Gianfranco Pacchioni

*Dipartimento di Scienza dei Materiali, Università degli Studi di Milano Bicocca, Via R. Cozzi 55*

*(20125) Milano, Italy*

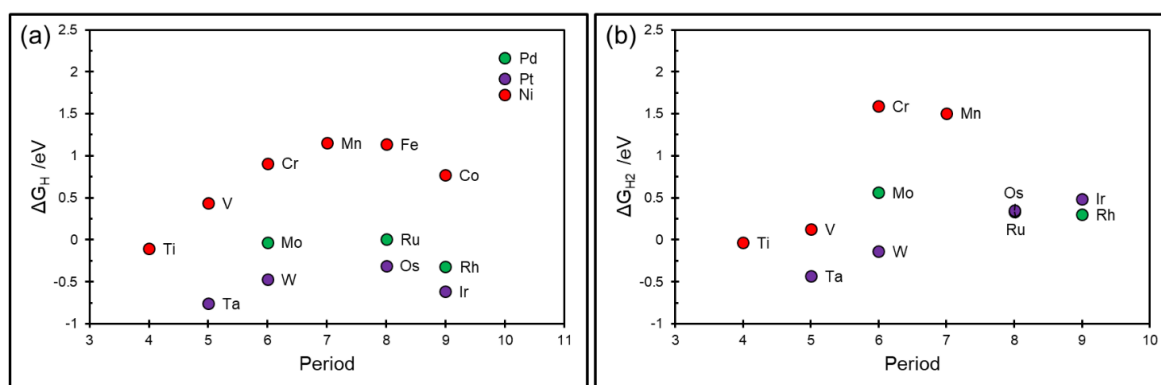

**Figure S1:** (a) Trend of reactivity to H\* vs TM group in the periodic table, (b) Trend of reactivity to H<sub>2</sub>\* vs TM group in the periodic table.

**Figure S2:** Gibbs free energy of hydrogen complexes against that of H\*.

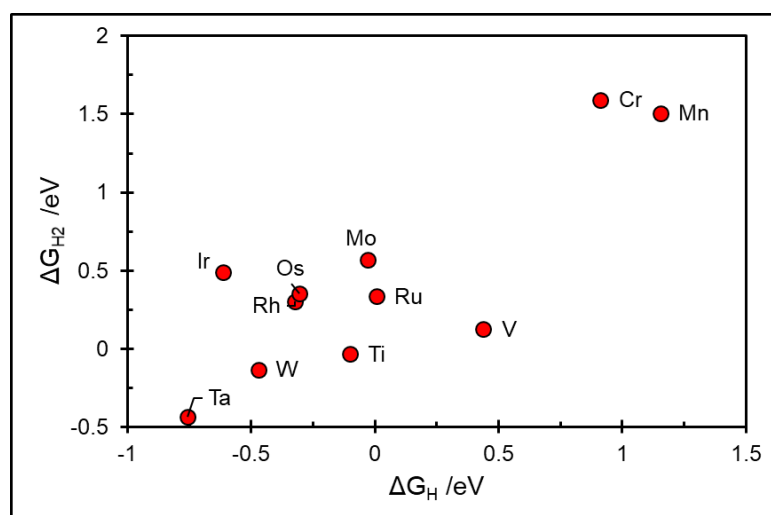

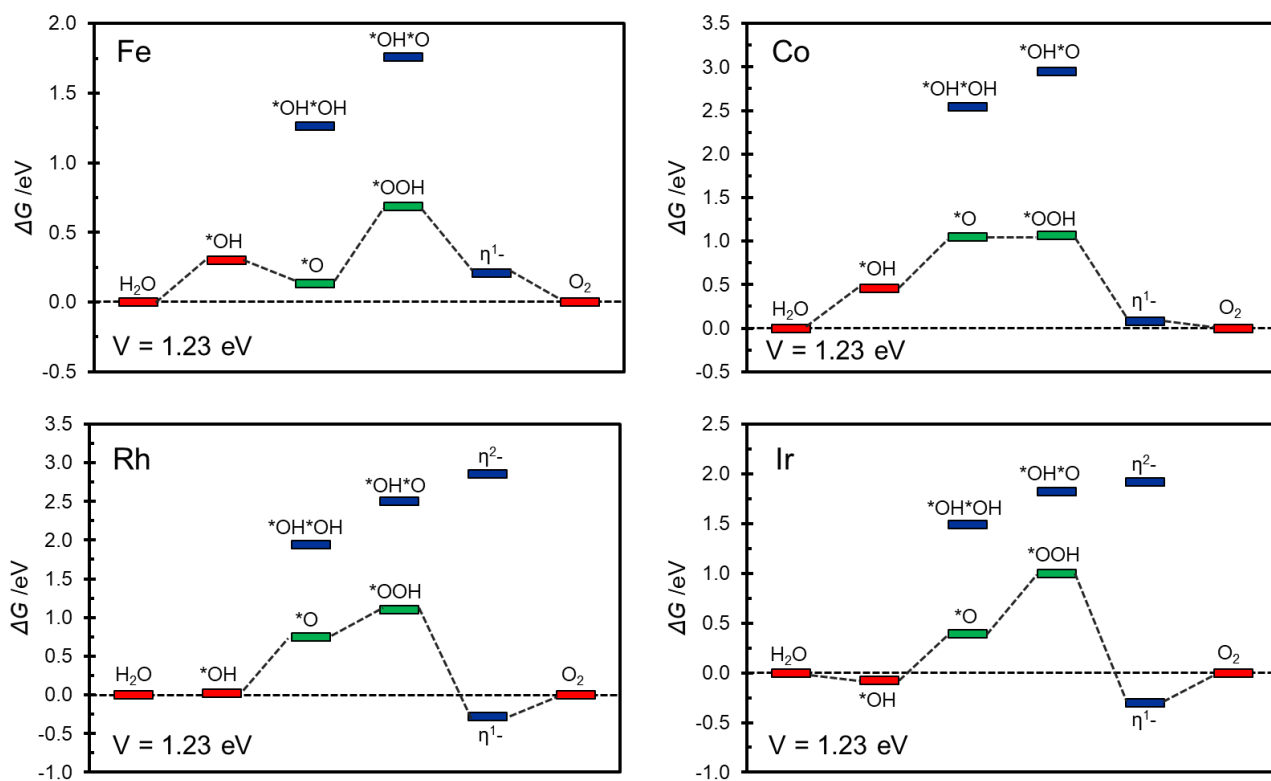

**Figure S3:** Gibbs Free Energy Profile of Fe, Co, Rh, and Ir SACs.

**Table S1:** Working entropic contributions of gas phase molecules at  $T= 300\text{K}$ .

| Species          | $TS / \text{eV}$ |
|------------------|------------------|
| H <sub>2</sub>   | 0.41             |
| O <sub>2</sub>   | 0.64             |
| H <sub>2</sub> O | 0.67             |

**Table S2:** Calculated Zero-point energy of relevant reaction intermediates.

|         | ZPE <sub>OH*</sub> | ZPE <sub>O*</sub> | ZPE <sub>OOH*</sub> | ZPE <sub>η1</sub> | ZPE <sub>η2</sub> | ZPE <sub>OH*OH*</sub> | ZPE <sub>O*OH*</sub> |
|---------|--------------------|-------------------|---------------------|-------------------|-------------------|-----------------------|----------------------|
| Mo      | 0.31               | 0.06              | 0.40                | 0.11              | 0.14              | 0.69                  | 0.41                 |
| Ru      | 0.32               | 0.05              | 0.42                | 0.13              | 0.10              | 0.69                  | 0.41                 |
| Rh      | 0.32               | 0.04              | 0.43                | 0.13              | 0.08              | 0.68                  | 0.39                 |
| Average | 0.32               | 0.05              | 0.41                | 0.12              | 0.11              | 0.69                  | 0.40                 |

The zero point contribution of H\* is often small, and typically value is 0.04 eV.<sup>1</sup>

**Table S3:** Comparison of adhesion energies of different TMs on COF, N-doped graphene (4N-Gr) and carbon nitride (C<sub>3</sub>N<sub>4</sub>).

| M  | E <sub>ADH</sub> (COF) /eV | E <sub>ADH</sub> (4N-Gr) /eV | E <sub>ADH</sub> (C <sub>3</sub> N <sub>4</sub> ) /eV |
|----|----------------------------|------------------------------|-------------------------------------------------------|
| Ti | -10.46                     | -8.50                        | -6.28                                                 |
| V  | -10.13                     | -7.86                        | -5.05                                                 |
| Cr | -9.36                      | -7.20                        | -3.57                                                 |
| Mn | -8.24                      | -6.80                        | -3.36                                                 |
| Fe | -8.93                      | -7.39                        | -3.45                                                 |
| Co | -9.27                      | -7.79                        | -3.34                                                 |
| Ni | -9.46                      | -7.78                        | -3.47                                                 |
| Pd | -8.39                      | -6.03                        | -2.24                                                 |
| Pt | -10.58                     | -7.99                        | -2.79                                                 |

**Table S4:** Gibbs free energies and O-O distances of the most stable oxygen complex intermediates for OER on TM@COF.

| M         | $\Delta G$ /eV | d <sub>O-O</sub> /Å | Isomer   |
|-----------|----------------|---------------------|----------|
| <i>Ti</i> | 1.27           | 1.46                | $\eta^2$ |
| <i>V</i>  | --             | --                  | --       |
| <i>Cr</i> | 4.53           | 1.29                | $\eta^1$ |
| <i>Mn</i> | 4.71           | 1.30                | $\eta^1$ |
| <i>Fe</i> | 5.12           | 1.28                | $\eta^1$ |
| <i>Co</i> | 4.99           | 1.25                | $\eta^1$ |
| <i>Ni</i> | --             | --                  | --       |
| <i>Nb</i> | -0.02          | 2.58                | $\eta^2$ |
| <i>Mo</i> | 0.76           | 2.55                | $\eta^2$ |
| <i>Ru</i> | 4.38           | 1.29                | $\eta^1$ |
| <i>Rh</i> | 4.63           | 1.27                | $\eta^1$ |
| <i>Pd</i> | --             | --                  | --       |
| <i>Ta</i> | -0.19          | 2.47                | $\eta^2$ |
| <i>W</i>  | -0.43          | 2.60                | $\eta^2$ |
| <i>Os</i> | 4.10           | 2.73                | $\eta^2$ |
| <i>Ir</i> | 4.61           | 1.28                | $\eta^1$ |
| <i>Pt</i> | --             | --                  | --       |

## References

- 1 J. K. Nørskov, T. Bligaard, A. Logadottir, J. R. Kitchin, J. G. Chen, S. Pandelov and U. Stimming, *J. Electrochem. Soc.*, 2005, **152**, J23.
